# Supplementary material for: Ba4FeCuS6: a new mixed metal sulfide with a pseudo-zero-dimensional structure containing rare CuS3 units
Source: Royal Society of Chemistry journal article supplement (doi:10.1039/d4nj03944k), 2024-01-01
Supplement: d4nj03944k1.pdf [file d4nj03944k1.pdf]

## Ba<sub>4</sub>FeCuS<sub>6</sub>: a new mixed metal sulfide with a pseudo-zero-dimensional structure containing rare CuS<sub>3</sub> units

Sambit S. S. Rout,<sup>a</sup> Gopabandhu Panigrahi,<sup>a</sup> Sweta Yadav,<sup>a</sup> K. V. Ramanujachary,<sup>b</sup> and Jai Prakash<sup>a,\*</sup>

<sup>a</sup>Department of Chemistry, Indian Institute of Technology Hyderabad, Kandi, Sangareddy, Telangana 502284, India

<sup>b</sup>Department of Chemistry and Biochemistry, Rowan University, Glassboro, New Jersey 08028, USA

### Electronic Supplementary Information (ESI)

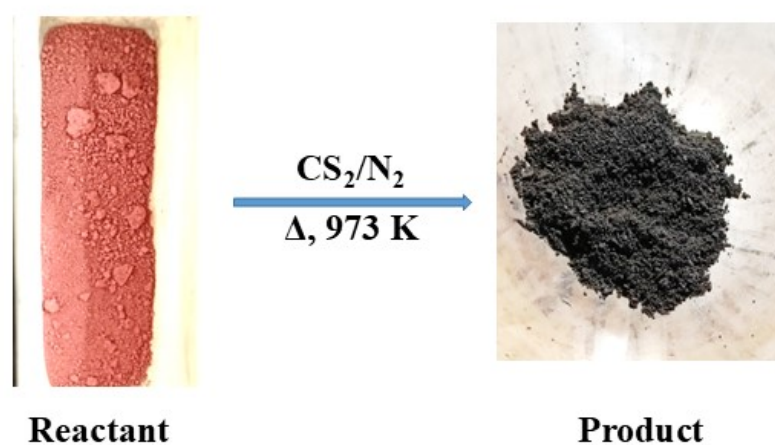

Fig. SI1: The polycrystalline Ba<sub>4</sub>FeCuS<sub>6</sub> sample before and after reaction by the CS<sub>2</sub> method.

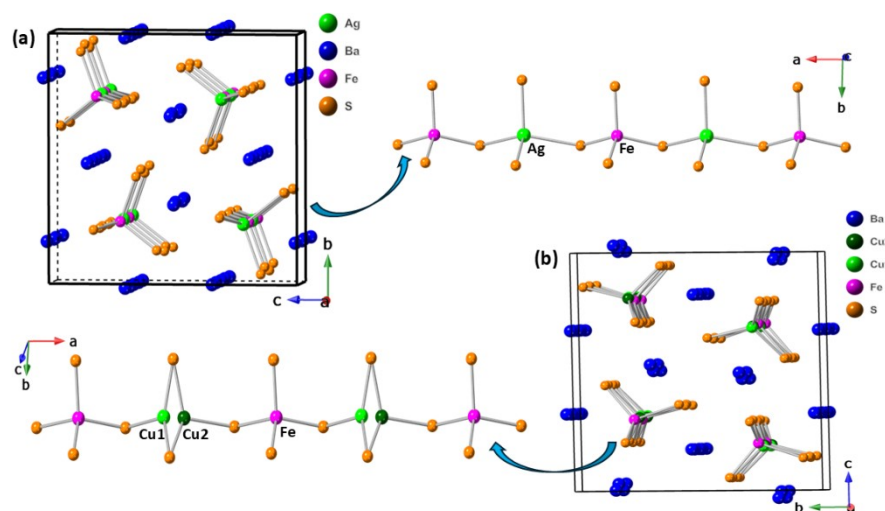

Fig. SI2: The structure comparison of (a) Ba<sub>4</sub>FeAgS<sub>6</sub> (Ag site was fully occupied)<sup>1</sup> and (b) Ba<sub>4</sub>FeCuS<sub>6</sub> (Cu site was split into two sites; Cu1 and Cu2).

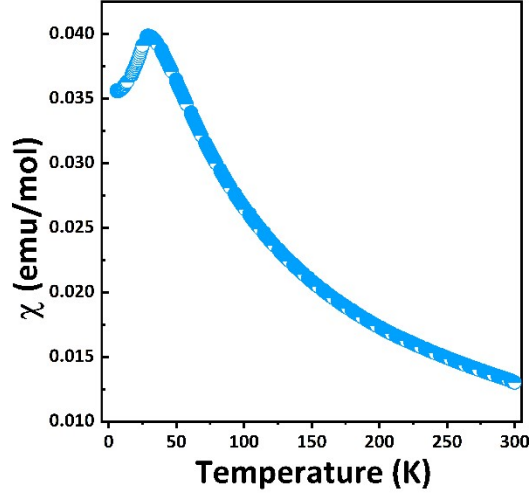

**Fig. SI3:** The temperature dependence (FW) of the molar magnetic susceptibility ( $\chi_{\text{mol}}$ ) of the polycrystalline  $\text{Ba}_4\text{FeCuS}_6$  sample under an applied magnetic field of 1000 Oe (0.1 T).

|     | $U^{11}$   | $U^{22}$   | $U^{33}$   | $U^{12}$    | $U^{13}$   | $U^{23}$    |
|-----|------------|------------|------------|-------------|------------|-------------|
| Ba1 | 0.0175(3)  | 0.0076(3)  | 0.0133(3)  | -0.0003(3)  | 0.0043(3)  | 0.0002(2)   |
| Ba2 | 0.0178(3)  | 0.0076(3)  | 0.0128(3)  | 0.0000(3)   | 0.0045(3)  | -0.0003(2)  |
| Ba3 | 0.0203(4)  | 0.0103(4)  | 0.0191(30) | -0.0003(3)  | 0.0076(3)  | 0.0008(3)   |
| Ba4 | 0.0175(4)  | 0.0115(4)  | 0.0173(3)  | -0.0007(3)  | 0.0050(3)  | -0.0022(3)  |
| Fe1 | 0.0167(8)  | 0.0059(8)  | 0.0117(7)  | 0.0005(6)   | 0.0020(6)  | -0.0006(6)  |
| Cu1 | 0.0440(15) | 0.0123(9)  | 0.0186(8)  | -0.0035(9)  | 0.0126(9)  | -0.0015(7)  |
| Cu2 | 0.0440(15) | 0.0123(9)  | 0.0186(8)  | -0.0035(9)  | 0.0126(9)  | -0.0015(7)  |
| S1  | 0.0205(15) | 0.0099(13) | 0.0104(12) | -0.0009(11) | 0.0038(11) | -0.0028(10) |
| S2  | 0.0198(15) | 0.0087(13) | 0.0157(13) | -0.0003(11) | 0.0054(11) | -0.0004(11) |
| S3  | 0.0188(14) | 0.0101(13) | 0.0126(12) | 0.0012(11)  | 0.0039(11) | 0.0007(10)  |
| S4  | 0.0195(15) | 0.0098(13) | 0.0134(13) | 0.0007(11)  | 0.0045(11) | -0.0001(10) |
| S5  | 0.0204(14) | 0.0068(13) | 0.0133(13) | 0.0000(11)  | 0.0028(11) | -0.0004(10) |
| S6  | 0.0294(17) | 0.0097(14) | 0.0180(14) | 0.0025(13)  | 0.0093(13) | 0.0019(11)  |

**Table SI1:** Atomic displacement parameter ( $\text{\AA}^2$ ) for monoclinic  $\text{Ba}_4\text{FeCuS}_6$

**Table SI2:** Geometric parameters ( $\text{\AA}$ ,  $^\circ$ ) for monoclinic  $\text{Ba}_4\text{FeCuS}_6$

|                       |            |                       |            |
|-----------------------|------------|-----------------------|------------|
| Ba1–S4 <sup>i</sup>   | 3.107(3)   | Ba3–S1                | 3.310(3)   |
| Ba1–S1 <sup>ii</sup>  | 3.172(3)   | Ba3–S4 <sup>vi</sup>  | 3.323(3)   |
| Ba1–S4                | 3.174(3)   | Ba3–Cu2 <sup>ix</sup> | 3.602(18)  |
| Ba1–S6                | 3.186(3)   | Ba3–Fe1               | 3.6553(18) |
| Ba1–S5 <sup>ii</sup>  | 3.200(3)   | Ba3–Cu1 <sup>ix</sup> | 3.712(2)   |
| Ba1–S3 <sup>iii</sup> | 3.201(3)   | Ba3–Cu2               | 3.81(2)    |
| Ba1–S2                | 3.311(3)   | Ba4–Cu2 <sup>vi</sup> | 3.035(19)  |
| Ba1–Cu2 <sup>iv</sup> | 3.64(2)    | Ba4–S3                | 3.138(3)   |
| Ba1–Cu1 <sup>ii</sup> | 3.651(2)   | Ba4–S4                | 3.175(3)   |
| Ba1–Fe1 <sup>ii</sup> | 3.8467(18) | Ba4–S6                | 3.204(3)   |

|                                          |            |                                          |            |
|------------------------------------------|------------|------------------------------------------|------------|
| Ba1–Ba2 <sup>iv</sup>                    | 4.2791(11) | Ba4–S2 <sup>x</sup>                      | 3.209(3)   |
| Ba1–Ba2 <sup>v</sup>                     | 4.4089(11) | Ba4–S5 <sup>v</sup>                      | 3.254(3)   |
| Ba2–S3 <sup>vi</sup>                     | 3.121(3)   | Ba4–S1 <sup>xi</sup>                     | 3.311(3)   |
| Ba2–S4 <sup>iii</sup>                    | 3.129(3)   | Ba4–S2 <sup>vii</sup>                    | 3.345(3)   |
| Ba2–S6                                   | 3.150(3)   | Ba4–Cu1 <sup>vi</sup>                    | 3.550(2)   |
| Ba2–S1 <sup>v</sup>                      | 3.197(3)   | Ba4–Fe1 <sup>xi</sup>                    | 3.5521(18) |
| Ba2–S2 <sup>vii</sup>                    | 3.236(3)   | Ba4–Fe1 <sup>v</sup>                     | 3.7794(18) |
| Ba2–S1 <sup>viii</sup>                   | 3.236(3)   | Fe1–S1                                   | 2.272(3)   |
| Ba2–S5                                   | 3.236(3)   | Fe1–S6 <sup>vii</sup>                    | 2.282(4)   |
| Ba2–Cu1                                  | 3.650(2)   | Fe1–S2 <sup>vii</sup>                    | 2.287(3)   |
| Ba2–Cu2 <sup>iv</sup>                    | 3.67(2)    | Fe1–S5                                   | 2.296(3)   |
| Ba2–Fe1                                  | 3.8767(18) | Cu1–Cu2                                  | 0.88(3)    |
| Ba2–Fe1 <sup>v</sup>                     | 3.8858(18) | Cu1–S4 <sup>vi</sup>                     | 2.280(3)   |
| Ba3–S3                                   | 3.087(3)   | Cu1–S3 <sup>vi</sup>                     | 2.290(4)   |
| Ba3–Cu1                                  | 3.236(2)   | Cu1–S5                                   | 2.332(4)   |
| Ba3–S2 <sup>vii</sup>                    | 3.247(3)   | Cu2–S3 <sup>vi</sup>                     | 2.311(19)  |
| Ba3–S6 <sup>vi</sup>                     | 3.294(3)   | Cu2–S4 <sup>vi</sup>                     | 2.315(19)  |
| Ba3–S3 <sup>vi</sup>                     | 3.303(3)   | Cu2–S6 <sup>xii</sup>                    | 2.45(3)    |
| Ba3–S5 <sup>ix</sup>                     | 3.303(3)   |                                          |            |
| S4 <sup>i</sup> –Ba1–S1 <sup>ii</sup>    | 85.92(8)   | Cu1 <sup>vi</sup> –Ba4–Fe1 <sup>xi</sup> | 87.85(5)   |
| S4 <sup>i</sup> –Ba1–S4                  | 80.98(9)   | Cu2 <sup>vi</sup> –Ba4–Fe1 <sup>v</sup>  | 136.6(4)   |
| S1 <sup>ii</sup> –Ba1–S4                 | 79.43(8)   | S3–Ba4–Fe1 <sup>v</sup>                  | 133.74(6)  |
| S4 <sup>i</sup> –Ba1–S6                  | 133.11(8)  | S4–Ba4–Fe1 <sup>v</sup>                  | 93.80(6)   |
| S1 <sup>ii</sup> –Ba1–S6                 | 123.23(9)  | S6–Ba4–Fe1 <sup>v</sup>                  | 37.00(6)   |
| S4–Ba1–S6                                | 71.15(8)   | S2 <sup>x</sup> –Ba4–Fe1 <sup>v</sup>    | 127.42(6)  |
| S4 <sup>i</sup> –Ba1–S5 <sup>ii</sup>    | 77.10(8)   | S5 <sup>v</sup> –Ba4–Fe1 <sup>v</sup>    | 37.16(6)   |
| S1 <sup>ii</sup> –Ba1–S5 <sup>ii</sup>   | 71.30(8)   | S1 <sup>xi</sup> –Ba4–Fe1 <sup>v</sup>   | 91.81(6)   |
| S4–Ba1–S5 <sup>ii</sup>                  | 144.32(8)  | S2 <sup>vii</sup> –Ba4–Fe1 <sup>v</sup>  | 74.71(6)   |
| S6–Ba1–S5 <sup>ii</sup>                  | 142.88(8)  | Cu1 <sup>vi</sup> –Ba4–Fe1 <sup>v</sup>  | 127.54(5)  |
| S4 <sup>i</sup> –Ba1–S3 <sup>iii</sup>   | 88.04(8)   | Fe1 <sup>xi</sup> –Ba4–Fe1 <sup>v</sup>  | 127.73(5)  |
| S1 <sup>ii</sup> –Ba1–S3 <sup>iii</sup>  | 153.35(8)  | Cu2 <sup>vi</sup> –Ba4–Ba3 <sup>vi</sup> | 60.9(5)    |
| S4–Ba1–S3 <sup>iii</sup>                 | 125.13(8)  | S3–Ba4–Ba3 <sup>vi</sup>                 | 50.78(6)   |
| S6–Ba1–S3 <sup>iii</sup>                 | 78.82(8)   | S4–Ba4–Ba3 <sup>vi</sup>                 | 51.05(6)   |
| S5 <sup>ii</sup> –Ba1–S3 <sup>iii</sup>  | 82.05(8)   | S6–Ba4–Ba3 <sup>vi</sup>                 | 50.43(6)   |
| S4 <sup>i</sup> –Ba1–S2                  | 155.46(8)  | S2 <sup>x</sup> –Ba4–Ba3 <sup>vi</sup>   | 140.03(6)  |
| S1 <sup>ii</sup> –Ba1–S2                 | 88.29(8)   | S5 <sup>v</sup> –Ba4–Ba3 <sup>vi</sup>   | 124.52(6)  |
| S4–Ba1–S2                                | 121.30(8)  | S1 <sup>xi</sup> –Ba4–Ba3 <sup>vi</sup>  | 136.42(6)  |
| S6–Ba1–S2                                | 68.94(8)   | S2 <sup>vii</sup> –Ba4–Ba3 <sup>vi</sup> | 87.04(6)   |
| S5 <sup>ii</sup> –Ba1–S2                 | 78.46(8)   | Cu1 <sup>vi</sup> –Ba4–Ba3 <sup>vi</sup> | 48.28(4)   |
| S3 <sup>iii</sup> –Ba1–S2                | 86.52(8)   | Fe1 <sup>xi</sup> –Ba4–Ba3 <sup>vi</sup> | 136.11(3)  |
| S4 <sup>i</sup> –Ba1–Cu2 <sup>iv</sup>   | 107.9(4)   | Fe1 <sup>v</sup> –Ba4–Ba3 <sup>vi</sup>  | 87.43(3)   |
| S1 <sup>ii</sup> –Ba1–Cu2 <sup>iv</sup>  | 164.2(4)   | S1–Fe1–S6 <sup>vii</sup>                 | 106.19(13) |
| S4–Ba1–Cu2 <sup>iv</sup>                 | 94.9(3)    | S1–Fe1–S2 <sup>vii</sup>                 | 108.59(12) |
| S6–Ba1–Cu2 <sup>iv</sup>                 | 41.3(4)    | S6 <sup>vii</sup> –Fe1–S2 <sup>vii</sup> | 107.25(13) |
| S5 <sup>ii</sup> –Ba1–Cu2 <sup>iv</sup>  | 118.5(3)   | S1–Fe1–S5                                | 108.78(12) |
| S3 <sup>iii</sup> –Ba1–Cu2 <sup>iv</sup> | 38.8(3)    | S6 <sup>vii</sup> –Fe1–S5                | 116.45(13) |
| S2–Ba1–Cu2 <sup>iv</sup>                 | 82.1(3)    | S2 <sup>vii</sup> –Fe1–S5                | 109.32(13) |
| S4 <sup>i</sup> –Ba1–Cu1 <sup>ii</sup>   | 38.37(6)   | S1–Fe1–Ba4 <sup>xi</sup>                 | 65.03(9)   |

|                                          |           |                                             |            |
|------------------------------------------|-----------|---------------------------------------------|------------|
| S1 <sup>ii</sup> -Ba1-Cu1 <sup>ii</sup>  | 79.64(7)  | S6 <sup>vii</sup> -Fe1-Ba4 <sup>xi</sup>    | 79.04(10)  |
| S4-Ba1-Cu1 <sup>ii</sup>                 | 116.55(6) | S2 <sup>vii</sup> -Fe1-Ba4 <sup>xi</sup>    | 62.30(9)   |
| S6-Ba1-Cu1 <sup>ii</sup>                 | 157.10(8) | S5-Fe1-Ba4 <sup>xi</sup>                    | 164.48(10) |
| S5 <sup>ii</sup> -Ba1-Cu1 <sup>ii</sup>  | 39.10(6)  | S1-Fe1-Ba3                                  | 62.90(9)   |
| S3 <sup>iii</sup> -Ba1-Cu1 <sup>ii</sup> | 79.55(7)  | S6 <sup>vii</sup> -Fe1-Ba3                  | 156.14(11) |
| S2-Ba1-Cu1 <sup>ii</sup>                 | 117.10(6) | S2 <sup>vii</sup> -Fe1-Ba3                  | 61.23(8)   |
| Cu2 <sup>iv</sup> -Ba1-Cu1 <sup>ii</sup> | 115.9(4)  | S5-Fe1-Ba3                                  | 87.41(9)   |
| S4 <sup>i</sup> -Ba1-Fe1 <sup>ii</sup>   | 87.35(6)  | Ba4 <sup>xi</sup> -Fe1-Ba3                  | 77.10(4)   |
| S1 <sup>ii</sup> -Ba1-Fe1 <sup>ii</sup>  | 36.18(6)  | S1-Fe1-Ba4 <sup>vii</sup>                   | 127.63(10) |
| S4-Ba1-Fe1 <sup>ii</sup>                 | 115.31(6) | S6 <sup>vii</sup> -Fe1-Ba4 <sup>vii</sup>   | 57.66(9)   |
| S6-Ba1-Fe1 <sup>ii</sup>                 | 138.48(7) | S2 <sup>vii</sup> -Fe1-Ba4 <sup>vii</sup>   | 123.68(9)  |
| S5 <sup>ii</sup> -Ba1-Fe1 <sup>ii</sup>  | 36.59(6)  | S5-Fe1-Ba4 <sup>vii</sup>                   | 58.88(8)   |
| S3 <sup>iii</sup> -Ba1-Fe1 <sup>ii</sup> | 117.65(6) | Ba4 <sup>xi</sup> -Fe1-Ba4 <sup>vii</sup>   | 136.49(5)  |
| S2-Ba1-Fe1 <sup>ii</sup>                 | 74.16(6)  | Ba3-Fe1-Ba4 <sup>vii</sup>                  | 146.14(5)  |
| Cu2 <sup>iv</sup> -Ba1-Fe1 <sup>ii</sup> | 148.3(3)  | S1-Fe1-Ba1 <sup>xiii</sup>                  | 55.51(8)   |
| Cu1 <sup>ii</sup> -Ba1-Fe1 <sup>ii</sup> | 60.30(5)  | S6 <sup>vii</sup> -Fe1-Ba1 <sup>xiii</sup>  | 113.15(10) |
| S4 <sup>i</sup> -Ba1-Ba2 <sup>iv</sup>   | 46.89(6)  | S2 <sup>vii</sup> -Fe1-Ba1 <sup>xiii</sup>  | 139.29(10) |
| S1 <sup>ii</sup> -Ba1-Ba2 <sup>iv</sup>  | 132.79(6) | S5-Fe1-Ba1 <sup>xiii</sup>                  | 56.18(8)   |
| S4-Ba1-Ba2 <sup>iv</sup>                 | 92.08(6)  | Ba4 <sup>xi</sup> -Fe1-Ba1 <sup>xiii</sup>  | 120.45(5)  |
| S6-Ba1-Ba2 <sup>iv</sup>                 | 96.38(6)  | Ba3-Fe1-Ba1 <sup>xiii</sup>                 | 79.27(4)   |
| S5 <sup>ii</sup> -Ba1-Ba2 <sup>iv</sup>  | 93.08(6)  | Ba4 <sup>vii</sup> -Fe1-Ba1 <sup>xiii</sup> | 83.79(4)   |
| S3 <sup>iii</sup> -Ba1-Ba2 <sup>iv</sup> | 46.62(5)  | S1-Fe1-Ba2                                  | 141.00(10) |
| S2-Ba1-Ba2 <sup>iv</sup>                 | 133.13(6) | S6 <sup>vii</sup> -Fe1-Ba2                  | 112.63(10) |
| Cu2 <sup>iv</sup> -Ba1-Ba2 <sup>iv</sup> | 61.6(4)   | S2 <sup>vii</sup> -Fe1-Ba2                  | 56.49(9)   |
| Cu1 <sup>ii</sup> -Ba1-Ba2 <sup>iv</sup> | 62.87(4)  | S5-Fe1-Ba2                                  | 56.49(8)   |
| Fe1 <sup>ii</sup> -Ba1-Ba2 <sup>iv</sup> | 123.09(3) | Ba4 <sup>xi</sup> -Fe1-Ba2                  | 118.46(5)  |
| S4 <sup>i</sup> -Ba1-Ba2 <sup>v</sup>    | 132.35(6) | Ba3-Fe1-Ba2                                 | 79.58(4)   |
| S1 <sup>ii</sup> -Ba1-Ba2 <sup>v</sup>   | 46.43(6)  | Ba4 <sup>vii</sup> -Fe1-Ba2                 | 78.83(3)   |
| S4-Ba1-Ba2 <sup>v</sup>                  | 88.72(6)  | Ba1 <sup>xiii</sup> -Fe1-Ba2                | 109.58(4)  |
| S6-Ba1-Ba2 <sup>v</sup>                  | 84.80(6)  | S1-Fe1-Ba2 <sup>vii</sup>                   | 55.35(8)   |
| S5 <sup>ii</sup> -Ba1-Ba2 <sup>v</sup>   | 85.70(6)  | S6 <sup>vii</sup> -Fe1-Ba2 <sup>vii</sup>   | 54.16(9)   |
| S3 <sup>iii</sup> -Ba1-Ba2 <sup>v</sup>  | 133.41(6) | S2 <sup>vii</sup> -Fe1-Ba2 <sup>vii</sup>   | 136.87(10) |
| S2-Ba1-Ba2 <sup>v</sup>                  | 46.94(5)  | S5-Fe1-Ba2 <sup>vii</sup>                   | 113.77(9)  |
| Cu2 <sup>iv</sup> -Ba1-Ba2 <sup>v</sup>  | 119.3(4)  | Ba4 <sup>xi</sup> -Fe1-Ba2 <sup>vii</sup>   | 75.30(4)   |
| Cu1 <sup>ii</sup> -Ba1-Ba2 <sup>v</sup>  | 115.88(4) | Ba3-Fe1-Ba2 <sup>vii</sup>                  | 118.18(4)  |
| Fe1 <sup>ii</sup> -Ba1-Ba2 <sup>v</sup>  | 55.66(3)  | Ba4 <sup>vii</sup> -Fe1-Ba2 <sup>vii</sup>  | 81.99(4)   |
| Ba2 <sup>iv</sup> -Ba1-Ba2 <sup>v</sup>  | 178.74(3) | Ba1 <sup>xiii</sup> -Fe1-Ba2 <sup>vii</sup> | 69.52(3)   |
| S3 <sup>vi</sup> -Ba2-S4 <sup>iii</sup>  | 89.09(8)  | Ba2-Fe1-Ba2 <sup>vii</sup>                  | 160.75(5)  |
| S3 <sup>vi</sup> -Ba2-S6                 | 84.75(8)  | Cu2-Cu1-S4 <sup>vi</sup>                    | 81.2(12)   |
| S4 <sup>iii</sup> -Ba2-S6                | 78.75(9)  | Cu2-Cu1-S3 <sup>vi</sup>                    | 80.2(12)   |
| S3 <sup>vi</sup> -Ba2-S1 <sup>v</sup>    | 154.64(8) | S4 <sup>vi</sup> -Cu1-S3 <sup>vi</sup>      | 116.08(13) |
| S4 <sup>iii</sup> -Ba2-S1 <sup>v</sup>   | 88.34(8)  | Cu2-Cu1-S5                                  | 137.3(12)  |
| S6-Ba2-S1 <sup>v</sup>                   | 70.01(8)  | S4 <sup>vi</sup> -Cu1-S5                    | 116.96(14) |
| S3 <sup>vi</sup> -Ba2-S2 <sup>vii</sup>  | 83.37(8)  | S3 <sup>vi</sup> -Cu1-S5                    | 117.87(14) |
| S4 <sup>iii</sup> -Ba2-S2 <sup>vii</sup> | 156.79(8) | Cu2-Cu1-Ba3                                 | 125.2(12)  |
| S6-Ba2-S2 <sup>vii</sup>                 | 78.72(8)  | S4 <sup>vi</sup> -Cu1-Ba3                   | 71.73(9)   |
| S1 <sup>v</sup> -Ba2-S2 <sup>vii</sup>   | 89.19(8)  | S3 <sup>vi</sup> -Cu1-Ba3                   | 71.08(9)   |
| S3 <sup>vi</sup> -Ba2-S1 <sup>viii</sup> | 121.96(8) | S5-Cu1-Ba3                                  | 97.48(11)  |

|                                           |             |                                              |            |
|-------------------------------------------|-------------|----------------------------------------------|------------|
| S4 <sup>iii</sup> –Ba2–S1 <sup>viii</sup> | 79.13(8)    | Cu2–Cu1–Ba4 <sup>vi</sup>                    | 48.4(12)   |
| S6–Ba2–S1 <sup>viii</sup>                 | 144.72(8)   | S4 <sup>vi</sup> –Cu1–Ba4 <sup>vi</sup>      | 61.52(9)   |
| S1 <sup>v</sup> –Ba2–S1 <sup>viii</sup>   | 82.22(8)    | S3 <sup>vi</sup> –Cu1–Ba4 <sup>vi</sup>      | 60.54(9)   |
| S2 <sup>vii</sup> –Ba2–S1 <sup>viii</sup> | 123.33(8)   | S5–Cu1–Ba4 <sup>vi</sup>                     | 174.25(12) |
| S3 <sup>vi</sup> –Ba2–S5                  | 77.02(8)    | Ba3–Cu1–Ba4 <sup>vi</sup>                    | 76.77(4)   |
| S4 <sup>iii</sup> –Ba2–S5                 | 128.96(8)   | Cu2–Cu1–Ba2                                  | 114.3(12)  |
| S6–Ba2–S5                                 | 145.69(8)   | S4 <sup>vi</sup> –Cu1–Ba2                    | 160.11(12) |
| S1 <sup>v</sup> –Ba2–S5                   | 123.11(8)   | S3 <sup>vi</sup> –Cu1–Ba2                    | 58.12(8)   |
| S2 <sup>vii</sup> –Ba2–S5                 | 70.57(8)    | S5–Cu1–Ba2                                   | 60.86(9)   |
| S1 <sup>viii</sup> –Ba2–S5                | 68.39(7)    | Ba3–Cu1–Ba2                                  | 88.70(6)   |
| S3 <sup>vi</sup> –Ba2–Cu1                 | 38.55(6)    | Ba4 <sup>vi</sup> –Cu1–Ba2                   | 118.42(5)  |
| S4 <sup>iii</sup> –Ba2–Cu1                | 108.85(7)   | Cu2–Cu1–Ba1 <sup>xiii</sup>                  | 116.4(12)  |
| S6–Ba2–Cu1                                | 120.42(7)   | S4 <sup>vi</sup> –Cu1–Ba1 <sup>xiii</sup>    | 57.80(9)   |
| S1 <sup>v</sup> –Ba2–Cu1                  | 160.91(7)   | S3 <sup>vi</sup> –Cu1–Ba1 <sup>xiii</sup>    | 158.62(12) |
| S2 <sup>vii</sup> –Ba2–Cu1                | 78.23(7)    | S5–Cu1–Ba1 <sup>xiii</sup>                   | 59.94(9)   |
| S1 <sup>viii</sup> –Ba2–Cu1               | 92.68(6)    | Ba3–Cu1–Ba1 <sup>xiii</sup>                  | 87.86(5)   |
| S5–Ba2–Cu1                                | 39.00(6)    | Ba4 <sup>vi</sup> –Cu1–Ba1 <sup>xiii</sup>   | 119.21(5)  |
| S3 <sup>vi</sup> –Ba2–Cu2 <sup>iv</sup>   | 78.8(3)     | Ba2–Cu1–Ba1 <sup>xiii</sup>                  | 119.59(6)  |
| S4 <sup>iii</sup> –Ba2–Cu2 <sup>iv</sup>  | 38.8(3)     | Cu2–Cu1–Ba3 <sup>viii</sup>                  | 76.0(12)   |
| S6–Ba2–Cu2 <sup>iv</sup>                  | 41.1(4)     | S4 <sup>vi</sup> –Cu1–Ba3 <sup>viii</sup>    | 116.61(10) |
| S1 <sup>v</sup> –Ba2–Cu2 <sup>iv</sup>    | 83.5(3)     | S3 <sup>vi</sup> –Cu1–Ba3 <sup>viii</sup>    | 116.88(10) |
| S2 <sup>vii</sup> –Ba2–Cu2 <sup>iv</sup>  | 118.1(3)    | S5–Cu1–Ba3 <sup>viii</sup>                   | 61.33(8)   |
| S1 <sup>viii</sup> –Ba2–Cu2 <sup>iv</sup> | 116.4(3)    | Ba3–Cu1–Ba3 <sup>viii</sup>                  | 158.80(8)  |
| S5–Ba2–Cu2 <sup>iv</sup>                  | 153.1(4)    | Ba4 <sup>vi</sup> –Cu1–Ba3 <sup>viii</sup>   | 124.42(7)  |
| Cu1–Ba2–Cu2 <sup>iv</sup>                 | 115.0(3)    | Ba2–Cu1–Ba3 <sup>viii</sup>                  | 80.62(4)   |
| S3 <sup>vi</sup> –Ba2–Fe1                 | 86.56(6)    | Ba1 <sup>xiii</sup> –Cu1–Ba3 <sup>viii</sup> | 81.70(4)   |
| S4 <sup>iii</sup> –Ba2–Fe1                | 165.23(7)   | Cu1–Cu2–S3 <sup>vi</sup>                     | 77.6(13)   |
| S6–Ba2–Fe1                                | 114.82(7)   | Cu1–Cu2–S4 <sup>vi</sup>                     | 76.7(13)   |
| S1 <sup>v</sup> –Ba2–Fe1                  | 101.54(6)   | S3 <sup>vi</sup> –Cu2–S4 <sup>vi</sup>       | 113.9(8)   |
| S2 <sup>vii</sup> –Ba2–Fe1                | 36.11(6)    | Cu1–Cu2–S6 <sup>xii</sup>                    | 152.7(15)  |
| S1 <sup>viii</sup> –Ba2–Fe1               | 91.23(6)    | S3 <sup>vi</sup> –Cu2–S6 <sup>xii</sup>      | 116.9(9)   |
| S5–Ba2–Fe1                                | 36.27(6)    | S4 <sup>vi</sup> –Cu2–S6 <sup>xii</sup>      | 113.5(9)   |
| Cu1–Ba2–Fe1                               | 60.02(5)    | Cu1–Cu2–Ba4 <sup>vi</sup>                    | 119.0(14)  |
| Cu2 <sup>iv</sup> –Ba2–Fe1                | 152.4(3)    | S3 <sup>vi</sup> –Cu2–Ba4 <sup>vi</sup>      | 70.4(5)    |
| S3 <sup>vi</sup> –Ba2–Fe1 <sup>v</sup>    | 119.06(6)   | S4 <sup>vi</sup> –Cu2–Ba4 <sup>vi</sup>      | 71.4(5)    |
| S4 <sup>iii</sup> –Ba2–Fe1 <sup>v</sup>   | 90.43(6)    | S6 <sup>xii</sup> –Cu2–Ba4 <sup>vi</sup>     | 88.2(7)    |
| S6–Ba2–Fe1 <sup>v</sup>                   | 35.96(6)    | Cu1–Cu2–Ba3 <sup>viii</sup>                  | 90.2(12)   |
| S1 <sup>v</sup> –Ba2–Fe1 <sup>v</sup>     | 35.77(6)    | S3 <sup>vi</sup> –Cu2–Ba3 <sup>viii</sup>    | 120.3(6)   |
| S2 <sup>vii</sup> –Ba2–Fe1 <sup>v</sup>   | 74.40(6)    | S4 <sup>vi</sup> –Cu2–Ba3 <sup>viii</sup>    | 119.5(7)   |
| S1 <sup>viii</sup> –Ba2–Fe1 <sup>v</sup>  | 117.65(6)   | S6 <sup>xii</sup> –Cu2–Ba3 <sup>viii</sup>   | 62.6(4)    |
| S5–Ba2–Fe1 <sup>v</sup>                   | 139.22(6)   | Ba4 <sup>vi</sup> –Cu2–Ba3 <sup>viii</sup>   | 150.8(9)   |
| Cu1–Ba2–Fe1 <sup>v</sup>                  | 147.03(4)   | Cu1–Cu2–Ba1 <sup>xii</sup>                   | 121.1(14)  |
| Cu2 <sup>iv</sup> –Ba2–Fe1 <sup>v</sup>   | 64.6(4)     | S3 <sup>vi</sup> –Cu2–Ba1 <sup>xii</sup>     | 60.2(4)    |
| Fe1–Ba2–Fe1 <sup>v</sup>                  | 104.017(18) | S4 <sup>vi</sup> –Cu2–Ba1 <sup>xii</sup>     | 155.7(9)   |
| S3 <sup>vi</sup> –Ba2–Ba1 <sup>xii</sup>  | 48.19(6)    | S6 <sup>xii</sup> –Cu2–Ba1 <sup>xii</sup>    | 59.3(5)    |
| S4 <sup>iii</sup> –Ba2–Ba1 <sup>xii</sup> | 46.46(6)    | Ba4 <sup>vi</sup> –Cu2–Ba1 <sup>xii</sup>    | 84.9(5)    |
| S6–Ba2–Ba1 <sup>xii</sup>                 | 96.29(7)    | Ba3 <sup>viii</sup> –Cu2–Ba1 <sup>xii</sup>  | 79.3(4)    |
| S1 <sup>v</sup> –Ba2–Ba1 <sup>xii</sup>   | 134.80(6)   | Cu1–Cu2–Ba2 <sup>xii</sup>                   | 118.6(14)  |

|                                            |           |                                             |            |
|--------------------------------------------|-----------|---------------------------------------------|------------|
| S2 <sup>vii</sup> –Ba2–Ba1 <sup>xii</sup>  | 131.51(6) | S3 <sup>vi</sup> –Cu2–Ba2 <sup>xii</sup>    | 155.1(8)   |
| S1 <sup>viii</sup> –Ba2–Ba1 <sup>xii</sup> | 87.95(6)  | S4 <sup>vi</sup> –Cu2–Ba2 <sup>xii</sup>    | 57.8(4)    |
| S5–Ba2–Ba1 <sup>xii</sup>                  | 92.88(6)  | S6 <sup>xii</sup> –Cu2–Ba2 <sup>xii</sup>   | 57.9(4)    |
| Cu1–Ba2–Ba1 <sup>xii</sup>                 | 62.87(4)  | Ba4 <sup>vi</sup> –Cu2–Ba2 <sup>xii</sup>   | 84.8(5)    |
| Cu2 <sup>iv</sup> –Ba2–Ba1 <sup>xii</sup>  | 61.9(4)   | Ba3 <sup>viii</sup> –Cu2–Ba2 <sup>xii</sup> | 80.5(4)    |
| Fe1–Ba2–Ba1 <sup>xii</sup>                 | 122.77(3) | Ba1 <sup>xii</sup> –Cu2–Ba2 <sup>xii</sup>  | 116.4(7)   |
| Fe1 <sup>v</sup> –Ba2–Ba1 <sup>xii</sup>   | 126.43(3) | Cu1–Cu2–Ba3                                 | 43.9(10)   |
| S3–Ba3–Cu1                                 | 126.29(7) | S3 <sup>vi</sup> –Cu2–Ba3                   | 59.4(5)    |
| S3–Ba3–S2 <sup>vii</sup>                   | 85.62(8)  | S4 <sup>vi</sup> –Cu2–Ba3                   | 59.9(5)    |
| Cu1–Ba3–S2 <sup>vii</sup>                  | 84.43(7)  | S6 <sup>xii</sup> –Cu2–Ba3                  | 163.2(8)   |
| S3–Ba3–S6 <sup>vi</sup>                    | 82.89(8)  | Ba4 <sup>vi</sup> –Cu2–Ba3                  | 75.1(4)    |
| Cu1–Ba3–S6 <sup>vi</sup>                   | 98.42(7)  | Ba3 <sup>viii</sup> –Cu2–Ba3                | 134.1(7)   |
| S2 <sup>vii</sup> –Ba3–S6 <sup>vi</sup>    | 167.50(8) | Ba1 <sup>xii</sup> –Cu2–Ba3                 | 119.6(5)   |
| S3–Ba3–S3 <sup>vi</sup>                    | 85.31(8)  | Ba2 <sup>xii</sup> –Cu2–Ba3                 | 117.6(5)   |
| Cu1–Ba3–S3 <sup>vi</sup>                   | 40.99(6)  | Fe1–S1–Ba1 <sup>xiii</sup>                  | 88.31(10)  |
| S2 <sup>vii</sup> –Ba3–S3 <sup>vi</sup>    | 80.40(8)  | Fe1–S1–Ba2 <sup>vii</sup>                   | 88.88(10)  |
| S6 <sup>vi</sup> –Ba3–S3 <sup>vi</sup>     | 93.72(8)  | Ba1 <sup>xiii</sup> –S1–Ba2 <sup>vii</sup>  | 87.61(8)   |
| S3–Ba3–S5 <sup>ix</sup>                    | 82.13(8)  | Fe1–S1–Ba2 <sup>ix</sup>                    | 169.85(13) |
| Cu1–Ba3–S5 <sup>ix</sup>                   | 150.26(7) | Ba1 <sup>xiii</sup> –S1–Ba2 <sup>ix</sup>   | 99.57(8)   |
| S2 <sup>vii</sup> –Ba3–S5 <sup>ix</sup>    | 90.01(8)  | Ba2 <sup>vii</sup> –S1–Ba2 <sup>ix</sup>    | 97.78(8)   |
| S6 <sup>vi</sup> –Ba3–S5 <sup>ix</sup>     | 93.29(8)  | Fe1–S1–Ba3                                  | 79.44(10)  |
| S3 <sup>vi</sup> –Ba3–S5 <sup>ix</sup>     | 164.74(8) | Ba1 <sup>xiii</sup> –S1–Ba3                 | 95.20(8)   |
| S3–Ba3–S1                                  | 138.75(8) | Ba2 <sup>vii</sup> –S1–Ba3                  | 167.87(10) |
| Cu1–Ba3–S1                                 | 84.10(7)  | Ba2 <sup>ix</sup> –S1–Ba3                   | 93.39(7)   |
| S2 <sup>vii</sup> –Ba3–S1                  | 68.74(7)  | Fe1–S1–Ba4 <sup>xi</sup>                    | 76.51(9)   |
| S6 <sup>vi</sup> –Ba3–S1                   | 123.57(8) | Ba1 <sup>xiii</sup> –S1–Ba4 <sup>xi</sup>   | 164.45(10) |
| S3 <sup>vi</sup> –Ba3–S1                   | 119.51(7) | Ba2 <sup>vii</sup> –S1–Ba4 <sup>xi</sup>    | 88.71(8)   |
| S5 <sup>ix</sup> –Ba3–S1                   | 66.73(7)  | Ba2 <sup>ix</sup> –S1–Ba4 <sup>xi</sup>     | 95.90(8)   |
| S3–Ba3–S4 <sup>vi</sup>                    | 140.84(8) | Ba3–S1–Ba4 <sup>xi</sup>                    | 85.45(7)   |
| Cu1–Ba3–S4 <sup>vi</sup>                   | 40.64(6)  | Fe1 <sup>v</sup> –S2–Ba4 <sup>iii</sup>     | 78.57(9)   |
| S2 <sup>vii</sup> –Ba3–S4 <sup>vi</sup>    | 119.63(7) | Fe1 <sup>v</sup> –S2–Ba2 <sup>v</sup>       | 87.40(10)  |
| S6 <sup>vi</sup> –Ba3–S4 <sup>vi</sup>     | 68.00(8)  | Ba4 <sup>iii</sup> –S2–Ba2 <sup>v</sup>     | 164.47(11) |
| S3 <sup>vi</sup> –Ba3–S4 <sup>vi</sup>     | 71.62(8)  | Fe1 <sup>v</sup> –S2–Ba3 <sup>v</sup>       | 80.65(10)  |
| S5 <sup>ix</sup> –Ba3–S4 <sup>vi</sup>     | 123.62(8) | Ba4 <sup>iii</sup> –S2–Ba3 <sup>v</sup>     | 88.19(8)   |
| S1–Ba3–S4 <sup>vi</sup>                    | 80.36(8)  | Ba2 <sup>v</sup> –S2–Ba3 <sup>v</sup>       | 96.14(8)   |
| S3–Ba3–Cu2 <sup>ix</sup>                   | 80.4(3)   | Fe1 <sup>v</sup> –S2–Ba1                    | 87.33(10)  |
| Cu1–Ba3–Cu2 <sup>ix</sup>                  | 132.8(4)  | Ba4 <sup>iii</sup> –S2–Ba1                  | 88.03(8)   |
| S2 <sup>vii</sup> –Ba3–Cu2 <sup>ix</sup>   | 140.8(4)  | Ba2 <sup>v</sup> –S2–Ba1                    | 84.66(7)   |
| S6 <sup>vi</sup> –Ba3–Cu2 <sup>ix</sup>    | 41.3(4)   | Ba3 <sup>v</sup> –S2–Ba1                    | 167.89(11) |
| S3 <sup>vi</sup> –Ba3–Cu2 <sup>ix</sup>    | 133.9(4)  | Fe1 <sup>v</sup> –S2–Ba4 <sup>v</sup>       | 170.33(13) |
| S5 <sup>ix</sup> –Ba3–Cu2 <sup>ix</sup>    | 52.1(4)   | Ba4 <sup>iii</sup> –S2–Ba4 <sup>v</sup>     | 95.08(8)   |
| S1–Ba3–Cu2 <sup>ix</sup>                   | 99.2(4)   | Ba2 <sup>v</sup> –S2–Ba4 <sup>v</sup>       | 99.65(8)   |
| S4 <sup>vi</sup> –Ba3–Cu2 <sup>ix</sup>    | 93.1(4)   | Ba3 <sup>v</sup> –S2–Ba4 <sup>v</sup>       | 91.95(8)   |
| S3–Ba3–Fe1                                 | 123.61(6) | Ba1–S2–Ba4 <sup>v</sup>                     | 99.84(8)   |
| Cu1–Ba3–Fe1                                | 66.00(5)  | Cu1 <sup>vi</sup> –S3–Cu2 <sup>vi</sup>     | 22.2(6)    |
| S2 <sup>vii</sup> –Ba3–Fe1                 | 38.12(6)  | Cu1 <sup>vi</sup> –S3–Ba3                   | 162.59(14) |
| S6 <sup>vi</sup> –Ba3–Fe1                  | 153.46(6) | Cu2 <sup>vi</sup> –S3–Ba3                   | 164.9(5)   |
| S3 <sup>vi</sup> –Ba3–Fe1                  | 87.73(6)  | Cu1 <sup>vi</sup> –S3–Ba2 <sup>vi</sup>     | 83.33(10)  |

|                                          |           |                                            |            |
|------------------------------------------|-----------|--------------------------------------------|------------|
| S5 <sup>ix</sup> –Ba3–Fe1                | 92.02(6)  | Cu2 <sup>vi</sup> –S3–Ba2 <sup>vi</sup>    | 96.7(5)    |
| S1–Ba3–Fe1                               | 37.66(5)  | Ba3–S3–Ba2 <sup>vi</sup>                   | 98.45(9)   |
| S4 <sup>vi</sup> –Ba3–Fe1                | 87.50(6)  | Cu1 <sup>vi</sup> –S3–Ba4                  | 80.00(10)  |
| Cu2 <sup>ix</sup> –Ba3–Fe1               | 136.1(4)  | Cu2 <sup>vi</sup> –S3–Ba4                  | 65.7(5)    |
| S3–Ba3–Cu1 <sup>ix</sup>                 | 80.02(6)  | Ba3–S3–Ba4                                 | 99.19(8)   |
| Cu1–Ba3–Cu1 <sup>ix</sup>                | 142.76(5) | Ba2 <sup>vi</sup> –S3–Ba4                  | 162.35(11) |
| S2 <sup>vii</sup> –Ba3–Cu1 <sup>ix</sup> | 127.51(7) | Cu1 <sup>vi</sup> –S3–Ba1 <sup>x</sup>     | 97.43(11)  |
| S6 <sup>vi</sup> –Ba3–Cu1 <sup>ix</sup>  | 55.04(7)  | Cu2 <sup>vi</sup> –S3–Ba1 <sup>x</sup>     | 81.0(6)    |
| S3 <sup>vi</sup> –Ba3–Cu1 <sup>ix</sup>  | 146.70(7) | Ba3–S3–Ba1 <sup>x</sup>                    | 99.97(9)   |
| S5 <sup>ix</sup> –Ba3–Cu1 <sup>ix</sup>  | 38.26(6)  | Ba2 <sup>vi</sup> –S3–Ba1 <sup>x</sup>     | 85.19(7)   |
| S1–Ba3–Cu1 <sup>ix</sup>                 | 90.38(6)  | Ba4–S3–Ba1 <sup>x</sup>                    | 91.23(8)   |
| S4 <sup>vi</sup> –Ba3–Cu1 <sup>ix</sup>  | 102.12(6) | Cu1 <sup>vi</sup> –S3–Ba3 <sup>vi</sup>    | 67.94(9)   |
| Cu2 <sup>ix</sup> –Ba3–Cu1 <sup>ix</sup> | 13.8(4)   | Cu2 <sup>vi</sup> –S3–Ba3 <sup>vi</sup>    | 83.6(6)    |
| Fe1–Ba3–Cu1 <sup>ix</sup>                | 125.21(5) | Ba3–S3–Ba3 <sup>vi</sup>                   | 94.68(8)   |
| S3–Ba3–Cu2                               | 120.9(3)  | Ba2 <sup>vi</sup> –S3–Ba3 <sup>vi</sup>    | 97.27(8)   |
| Cu1–Ba3–Cu2                              | 10.9(3)   | Ba4–S3–Ba3 <sup>vi</sup>                   | 81.83(7)   |
| S2 <sup>vii</sup> –Ba3–Cu2               | 93.3(3)   | Ba1 <sup>x</sup> –S3–Ba3 <sup>vi</sup>     | 164.63(11) |
| S6 <sup>vi</sup> –Ba3–Cu2                | 88.4(3)   | Cu1 <sup>vi</sup> –S4–Cu2 <sup>vi</sup>    | 22.2(6)    |
| S3 <sup>vi</sup> –Ba3–Cu2                | 37.0(3)   | Cu1 <sup>vi</sup> –S4–Ba1 <sup>i</sup>     | 83.83(10)  |
| S5 <sup>ix</sup> –Ba3–Cu2                | 156.9(3)  | Cu2 <sup>vi</sup> –S4–Ba1 <sup>i</sup>     | 97.9(5)    |
| S1–Ba3–Cu2                               | 93.2(3)   | Cu1 <sup>vi</sup> –S4–Ba2 <sup>x</sup>     | 99.71(11)  |
| S4 <sup>vi</sup> –Ba3–Cu2                | 37.0(3)   | Cu2 <sup>vi</sup> –S4–Ba2 <sup>x</sup>     | 83.5(6)    |
| Cu2 <sup>ix</sup> –Ba3–Cu2               | 125.2(6)  | Ba1 <sup>i</sup> –S4–Ba2 <sup>x</sup>      | 86.65(8)   |
| Fe1–Ba3–Cu2                              | 76.9(3)   | Cu1 <sup>vi</sup> –S4–Ba1                  | 158.38(14) |
| Cu1 <sup>ix</sup> –Ba3–Cu2               | 137.0(3)  | Cu2 <sup>vi</sup> –S4–Ba1                  | 162.6(5)   |
| Cu2 <sup>vi</sup> –Ba4–S3                | 43.9(4)   | Ba1 <sup>i</sup> –S4–Ba1                   | 99.02(9)   |
| Cu2 <sup>vi</sup> –Ba4–S4                | 43.7(4)   | Ba2 <sup>x</sup> –S4–Ba1                   | 101.85(9)  |
| S3–Ba4–S4                                | 75.78(8)  | Cu1 <sup>vi</sup> –S4–Ba4                  | 79.34(10)  |
| Cu2 <sup>vi</sup> –Ba4–S6                | 105.6(5)  | Cu2 <sup>vi</sup> –S4–Ba4                  | 64.9(5)    |
| S3–Ba4–S6                                | 98.76(8)  | Ba1 <sup>i</sup> –S4–Ba4                   | 162.75(11) |
| S4–Ba4–S6                                | 70.92(8)  | Ba2 <sup>x</sup> –S4–Ba4                   | 92.42(8)   |
| Cu2 <sup>vi</sup> –Ba4–S2 <sup>x</sup>   | 94.1(4)   | Ba1–S4–Ba4                                 | 98.03(8)   |
| S3–Ba4–S2 <sup>x</sup>                   | 89.36(8)  | Cu1 <sup>vi</sup> –S4–Ba3 <sup>vi</sup>    | 67.62(9)   |
| S4–Ba4–S2 <sup>x</sup>                   | 130.58(8) | Cu2 <sup>vi</sup> –S4–Ba3 <sup>vi</sup>    | 83.1(6)    |
| S6–Ba4–S2 <sup>x</sup>                   | 158.47(8) | Ba1 <sup>i</sup> –S4–Ba3 <sup>vi</sup>     | 96.18(8)   |
| Cu2 <sup>vi</sup> –Ba4–S5 <sup>v</sup>   | 155.4(4)  | Ba2 <sup>x</sup> –S4–Ba3 <sup>vi</sup>     | 166.52(11) |
| S3–Ba4–S5 <sup>v</sup>                   | 160.21(8) | Ba1–S4–Ba3 <sup>vi</sup>                   | 90.76(8)   |
| S4–Ba4–S5 <sup>v</sup>                   | 117.53(8) | Ba4–S4–Ba3 <sup>vi</sup>                   | 80.97(7)   |
| S6–Ba4–S5 <sup>v</sup>                   | 74.12(8)  | Fe1–S5–Cu1                                 | 109.10(13) |
| S2 <sup>x</sup> –Ba4–S5 <sup>v</sup>     | 91.58(8)  | Fe1–S5–Ba1 <sup>xiii</sup>                 | 87.22(10)  |
| Cu2 <sup>vi</sup> –Ba4–S1 <sup>xi</sup>  | 92.5(4)   | Cu1–S5–Ba1 <sup>xiii</sup>                 | 80.96(9)   |
| S3–Ba4–S1 <sup>xi</sup>                  | 130.93(8) | Fe1–S5–Ba2                                 | 87.24(10)  |
| S4–Ba4–S1 <sup>xi</sup>                  | 85.61(8)  | Cu1–S5–Ba2                                 | 80.14(10)  |
| S6–Ba4–S1 <sup>xi</sup>                  | 117.48(8) | Ba1 <sup>xiii</sup> –S5–Ba2                | 157.34(10) |
| S2 <sup>x</sup> –Ba4–S1 <sup>xi</sup>    | 69.17(8)  | Fe1–S5–Ba4 <sup>vii</sup>                  | 83.95(10)  |
| S5 <sup>v</sup> –Ba4–S1 <sup>xi</sup>    | 67.28(7)  | Cu1–S5–Ba4 <sup>vii</sup>                  | 166.36(13) |
| Cu2 <sup>vi</sup> –Ba4–S2 <sup>vii</sup> | 127.1(4)  | Ba1 <sup>xiii</sup> –S5–Ba4 <sup>vii</sup> | 104.21(9)  |
| S3–Ba4–S2 <sup>vii</sup>                 | 83.18(8)  | Ba2–S5–Ba4 <sup>vii</sup>                  | 97.03(8)   |

|                                          |           |                                             |            |
|------------------------------------------|-----------|---------------------------------------------|------------|
| S4–Ba4–S2 <sup>vii</sup>                 | 137.41(8) | Fe1–S5–Ba3 <sup>viii</sup>                  | 170.43(13) |
| S6–Ba4–S2 <sup>vii</sup>                 | 76.38(8)  | Cu1–S5–Ba3 <sup>viii</sup>                  | 80.41(10)  |
| S2 <sup>x</sup> –Ba4–S2 <sup>vii</sup>   | 84.92(8)  | Ba1 <sup>xiii</sup> –S5–Ba3 <sup>viii</sup> | 95.57(8)   |
| S5 <sup>v</sup> –Ba4–S2 <sup>vii</sup>   | 77.22(7)  | Ba2–S5–Ba3 <sup>viii</sup>                  | 93.51(8)   |
| S1 <sup>xi</sup> –Ba4–S2 <sup>vii</sup>  | 134.55(8) | Ba4 <sup>vii</sup> –S5–Ba3 <sup>viii</sup>  | 86.49(7)   |
| Cu2 <sup>vi</sup> –Ba4–Cu1 <sup>vi</sup> | 12.6(5)   | Fe1 <sup>v</sup> –S6–Cu2 <sup>iv</sup>      | 117.5(5)   |
| S3–Ba4–Cu1 <sup>vi</sup>                 | 39.45(6)  | Fe1 <sup>v</sup> –S6–Ba2                    | 89.87(11)  |
| S4–Ba4–Cu1 <sup>vi</sup>                 | 39.13(6)  | Cu2 <sup>iv</sup> –S6–Ba2                   | 81.0(4)    |
| S6–Ba4–Cu1 <sup>vi</sup>                 | 93.99(7)  | Fe1 <sup>v</sup> –S6–Ba1                    | 90.50(11)  |
| S2 <sup>x</sup> –Ba4–Cu1 <sup>vi</sup>   | 104.71(7) | Cu2 <sup>iv</sup> –S6–Ba1                   | 79.4(4)    |
| S5 <sup>v</sup> –Ba4–Cu1 <sup>vi</sup>   | 156.59(7) | Ba2–S6–Ba1                                  | 158.12(12) |
| S1 <sup>xi</sup> –Ba4–Cu1 <sup>vi</sup>  | 102.57(6) | Fe1 <sup>v</sup> –S6–Ba4                    | 85.34(11)  |
| S2 <sup>vii</sup> –Ba4–Cu1 <sup>vi</sup> | 120.24(6) | Cu2 <sup>iv</sup> –S6–Ba4                   | 156.8(5)   |
| Cu2 <sup>vi</sup> –Ba4–Fe1 <sup>xi</sup> | 75.3(5)   | Ba2–S6–Ba4                                  | 104.64(9)  |
| S3–Ba4–Fe1 <sup>xi</sup>                 | 98.38(6)  | Ba1–S6–Ba4                                  | 97.20(9)   |
| S4–Ba4–Fe1 <sup>xi</sup>                 | 96.05(6)  | Fe1 <sup>v</sup> –S6–Ba3 <sup>vi</sup>      | 166.35(15) |
| S6–Ba4–Fe1 <sup>xi</sup>                 | 155.06(7) | Cu2 <sup>iv</sup> –S6–Ba3 <sup>vi</sup>     | 76.1(5)    |
| S2 <sup>x</sup> –Ba4–Fe1 <sup>xi</sup>   | 39.13(6)  | Ba2–S6–Ba3 <sup>vi</sup>                    | 93.67(8)   |
| S5 <sup>v</sup> –Ba4–Fe1 <sup>xi</sup>   | 94.76(6)  | Ba1–S6–Ba3 <sup>vi</sup>                    | 91.09(8)   |
| S1 <sup>xi</sup> –Ba4–Fe1 <sup>xi</sup>  | 38.46(6)  | Ba4–S6–Ba3 <sup>vi</sup>                    | 81.00(7)   |
| S2 <sup>vii</sup> –Ba4–Fe1 <sup>xi</sup> | 123.69(6) |                                             |            |

Symmetry codes: (i)  $-x+1, -y+2, -z+1$ ; (ii)  $x, y+1, z$ ; (iii)  $x+1/2, -y+3/2, z+1/2$ ; (iv)  $-x+3/2, y+1/2, -z+3/2$ ; (v)  $-x+1/2, y+1/2, -z+3/2$ ; (vi)  $-x+1, -y+1, -z+1$ ; (vii)  $-x+1/2, y-1/2, -z+3/2$ ; (viii)  $x+1/2, -y+1/2, z+1/2$ ; (ix)  $x-1/2, -y+1/2, z-1/2$ ; (x)  $x-1/2, -y+3/2, z-1/2$ ; (xi)  $-x, -y+1, -z+1$ ; (xii)  $-x+3/2, y-1/2, -z+3/2$ ; (xiii)  $x, y-1, z$ .

**Table SI3: The fractional atomic coordinates and  $U_{\text{iso}}/U_{\text{eq}}$  values for the orthorhombic  $\text{Ba}_4\text{FeCuS}_6$  (space group:  $Pnma$ ) structure.<sup>a</sup>**

| Atoms | Wyckoff position | Site symmetry | SOF | x           | y        | z           | $U_{\text{iso}}/U_{\text{eq}}$ |
|-------|------------------|---------------|-----|-------------|----------|-------------|--------------------------------|
| Ba1   | 4c               | .m.           | 1   | 0.48949(9)  | 0.250000 | 0.32485(9)  | 0.0160(3)                      |
| Ba2   | 4c               | .m.           | 1   | 0.82477(11) | 0.250000 | 0.51773(14) | 0.0304(4)                      |
| Fe1   | 4c               | .m.           | 0.5 | 0.7563(3)   | 0.750000 | 0.3061(3)   | 0.0677(18)                     |
| Cu1   | 4c               | .m.           | 0.5 | 0.7563(3)   | 0.750000 | 0.3061(3)   | 0.0677(18)                     |
| S1    | 4c               | .m.           | 1   | 0.6338(4)   | 0.750000 | 0.4451(4)   | 0.0176(10)                     |
| S2    | 4c               | .m.           | 1   | 0.9384(4)   | 0.750000 | 0.3609(4)   | 0.0206(10)                     |
| S3    | 4c               | .m.           | 1   | 0.7240(4)   | 0.250000 | 0.2068(4)   | 0.043(2)                       |

<sup>a</sup> $U_{\text{iso}}/U_{\text{eq}}$  is the one-third value of the trace of the orthogonalized  $U_{ij}$  tensor.



**Table SI4: Atomic displacement parameter ( $\text{\AA}^2$ ) for Orthorhombic  $\text{Ba}_4\text{FeCuS}_6$  (space group:  $Pnma$ )**

|     | $U^{11}$   | $U^{22}$  | $U^{33}$   | $U^{12}$ | $U^{13}$    | $U^{23}$ |
|-----|------------|-----------|------------|----------|-------------|----------|
| Ba1 | 0.0084(5)  | 0.0244(6) | 0.0153(5)  | 0.000    | -0.0001(4)  | 0.000    |
| Ba2 | 0.0123(6)  | 0.0265(7) | 0.0524(9)  | 0.000    | 0.0048(5)   | 0.000    |
| Fe1 | 0.0125(14) | 0.165(6)  | 0.0252(17) | 0.000    | 0.0047(12)  | 0.000    |
| Cu1 | 0.0125(14) | 0.165(6)  | 0.0252(17) | 0.000    | 0.0047(12)  | 0.000    |
| S1  | 0.0115(19) | 0.028(3)  | 0.0134(19) | 0.000    | 0.0012(16)  | 0.000    |
| S2  | 0.015(2)   | 0.029(3)  | 0.018(2)   | 0.000    | -0.0025(17) | 0.000    |
| S3  | 0.008(2)   | 0.104(7)  | 0.019(2)   | 0.000    | 0.0022(18)  | 0.000    |

## Reference

1 G. Panigrahi, S. Yadav, S. Jana, K. V. Ramanujachary, M. K. Niranjana and J. Prakash, *Dalton Trans.*, 2023, **52**, 621–634.
